# Supplementary material
Source: ML conference proceedings conference paper supplement (https://proceedings.neurips.cc/paper_files/paper/2024/hash/af97b61e9fef8f55e32a2602af364d8c-Abstract.html)
Supplement: Supplementary file 1 [file af97b61e9fef8f55e32a2602af364d8c-Supplemental-Datasets_and_Benchmarks_Track.pdf]

## 473 A Details of Platform

### 474 A.1 Flight Dynamics Model

475 The 6-DoF atmospheric dynamics of a rigid aircraft are described by a set of standard nonlinear  
 476 ordinary differential equations, which are not detailed here for brevity; interested readers are referred  
 477 to [9] [16]. This model differentiates between a ground-based inertial frame and an aircraft-based  
 478 reference frame. The ground-based frame  $\mathcal{F}_E = \{O_E; x_E, y_E, z_E\}$  is inertial, ignoring Earth's  
 479 rotational effects, which is a valid assumption for low-altitude flight. The frame's origin is fixed at  
 480 point  $O_E$  on the ground, with  $x_E$  pointing north,  $y_E$  east, and  $z_E$  downwards. This is also known as  
 481 the NED (North-East-Down) frame. The aircraft body-fixed frame  $\mathcal{F}_B = \{G; x_B, y_B, z_B\}$  originates  
 482 at the aircraft's center of gravity  $G$ . Here,  $x_B$  aligns with the fuselage pointing forward,  $y_B$  points  
 483 rightward, and  $z_B$  downward.

484 The motion equations are derived from Newton's second law for an air vehicle, resulting in six core  
 485 scalar equations (conservation of linear and angular momentum in  $\mathcal{F}_B$ ), flight path equations (for  
 486 tracking the aircraft's center-of-gravity relative to  $\mathcal{F}_E$ ), and rigid-body kinematic equations (defining  
 487 the aircraft's attitude quaternion to describe the body axes orientation relative to the inertial ground  
 488 frame).

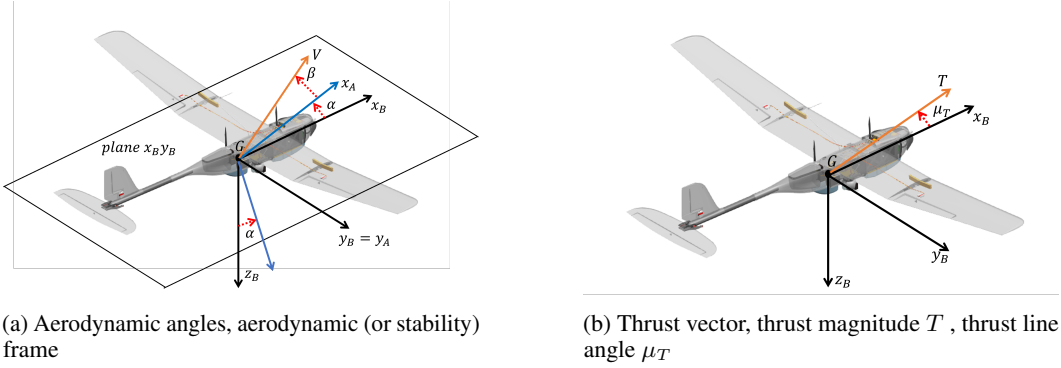

Figure 8: Fixed-Wing aircraft flight dynamics model

489 The conservation of linear momentum equations (CLMEs) for a rigid aircraft with constant mass can  
 490 be expressed by the following three fundamental scalar equations 1:

$$\dot{u} = rv - qw + \frac{1}{m} (W_x + F_x^{(A)} + F_x^{(T)}) \quad (1a)$$

$$\dot{v} = -ru + pw + \frac{1}{m} (W_y + F_y^{(A)} + F_y^{(T)}) \quad (1b)$$

$$\dot{w} = qu - pv + \frac{1}{m} (W_z + F_z^{(A)} + F_z^{(T)}) \quad (1c)$$

493 where  $\mathbf{W}$  represents the aircraft's weight,  $F^{(A)}$  denotes the aerodynamic forces, and  $F^{(T)}$  stands for  
 494 the thrust forces. These forces are decomposed into body frame components  $\mathcal{F}_B$  for simplicity in  
 495 deriving Eqs. 1a, 1b, 1c.

496 The weight force, always aligned with the inertial  $z_E$  axis, is  $mg$  and its components in the body  
 497 frame are given by:

$$\begin{Bmatrix} W_x \\ W_y \\ W_z \end{Bmatrix} = [T_{BE}] \begin{Bmatrix} 0 \\ 0 \\ mg \end{Bmatrix} = \begin{Bmatrix} 2(q_z q_x - q_0 q_y) \\ 2(q_y q_z + q_0 q_x) \\ q_0^2 - q_x^2 - q_y^2 + q_z^2 \end{Bmatrix} mg \quad (2)$$

498 The matrix  $[T_{BE}]$  describes the direction cosines for the instantaneous attitude of frame  $\mathcal{F}_B$  relative  
 499 to frame  $\mathcal{F}_E$ . Its entries are functions of the aircraft's attitude quaternion components  $(q_0, q_x, q_y, q_z)$   
 500 3:

$$[T_{BE}] = \begin{bmatrix} q_0^2 + q_x^2 - q_y^2 - q_z^2 & 2(q_x q_y + q_0 q_z) & 2(q_x q_z - q_0 q_y) \\ 2(q_x q_y - q_0 q_z) & q_0^2 - q_x^2 + q_y^2 - q_z^2 & 2(q_y q_z + q_0 q_x) \\ 2(q_x q_z + q_0 q_y) & 2(q_y q_z - q_0 q_x) & q_0^2 - q_x^2 - q_y^2 + q_z^2 \end{bmatrix} \quad (3)$$

501 The aerodynamic force  $F^{(A)}$  acting on the aircraft, projected onto frame  $\mathcal{F}_B$ , is given by 4:

$$\begin{Bmatrix} F_x^{(A)} \\ F_y^{(A)} \\ F_z^{(A)} \end{Bmatrix} = [T_{BW}] \begin{Bmatrix} -D \\ -C \\ -L \end{Bmatrix} \quad (4)$$

$$\begin{Bmatrix} F_x^{(A)} \\ F_y^{(A)} \\ F_z^{(A)} \end{Bmatrix} = \begin{bmatrix} -D \cos \alpha \cos \beta + L \sin \alpha + C \cos \alpha \sin \beta \\ -C \cos \beta - D \sin \beta \\ -D \sin \alpha \cos \beta - L \cos \alpha + C \sin \alpha \sin \beta \end{bmatrix} \quad (5)$$

502 The aerodynamic drag  $D$ , cross force  $C$ , and lift  $L$  account for the effects of external airflow. The  
 503 coordinate transformation matrix  $[T_{BW}]$  from the standard wind frame  $\mathcal{F}_W = \{G; x_W, y_W, z_W\}$  to  
 504  $\mathcal{F}_B$  is given by:

$$[T_{BW}] = \begin{bmatrix} \cos \alpha & 0 & -\sin \alpha \\ 0 & 1 & 0 \\ \sin \alpha & 0 & \cos \alpha \end{bmatrix} \begin{bmatrix} \cos \beta & -\sin \beta & 0 \\ \sin \beta & \cos \beta & 0 \\ 0 & 0 & 1 \end{bmatrix} \quad (6)$$

505 Equations 1a, 1b, 1c are expressed in closed form since the aerodynamic angles  $(\alpha, \beta)$  and force  
 506 components  $(D, C, L)$  are functions of the aircraft's state variables and external conditions. According  
 507 to Figure 8a, the state variables  $(u, v, w)$ , which are components of the aircraft's velocity vector  $\mathbf{V}$  in  
 508  $\mathcal{F}_B$ , are related to  $(\alpha, \beta)$  as follows:

$$u = V \cos \beta \cos \alpha \quad (7a)$$

$$v = V \sin \beta \quad (7b)$$

$$w = V \cos \beta \sin \alpha \quad (7c)$$

511 where

$$V = \sqrt{u^2 + v^2 + w^2} \quad (8)$$

512 The instantaneous angles of attack and sideslip are given by:

$$\alpha = \tan^{-1} \frac{w}{u}, \quad \beta = \sin^{-1} \frac{v}{\sqrt{u^2 + v^2 + w^2}} \quad (9)$$

513 The aerodynamic forces are described using their aerodynamic coefficients in the following standard  
 514 formulas:

$$D = \frac{1}{2} \rho V^2 S C_D, \quad C = \frac{1}{2} \rho V^2 S C_C, \quad L = \frac{1}{2} \rho V^2 S C_L \quad (10)$$

515 where the air density  $\rho$  depends on the flight altitude  $h = -z_{E,G}$  and other atmospheric properties  
 516 like the sound speed  $a$  [53].  $S$  represents a reference area, while the coefficients ( $C_D, C_C, C_L$ ) vary  
 517 with the aircraft's state and external inputs.

518 Finally, as shown in Figure 8b, the thrust force  $F^{(T)}$  of magnitude  $T$  is expressed in the body-frame  
 519 components as follows:

$$\begin{Bmatrix} F_x^{(T)} \\ F_y^{(T)} \\ F_z^{(T)} \end{Bmatrix} = \delta_T T_{\max}(h, M) \begin{Bmatrix} \cos \mu_T \\ 0 \\ \sin \mu_T \end{Bmatrix} \quad (11)$$

520 where  $\mu_T$  is a constant angle between the thrust line and the reference axis  $x_B$  in the aircraft's  
 521 symmetry plane. The thrust  $T = \delta_T T_{\max}(h, M)$ , where  $\delta_T$  is the throttle setting (an external input),  
 522 and  $T_{\max}(h, M)$  is the maximum thrust available, dependent on altitude and Mach number  $M = V/a$ .

523 The conservation of angular momentum equations (CAMEs) for a rigid aircraft with constant mass  
 524 are given by [9]:

$$\dot{p} = (C_1 r + C_2 p)q + C_3 L + C_4 N \quad (12a)$$

$$\dot{q} = C_5 p r - C_6 (p^2 - r^2) + C_7 M \quad (12b)$$

$$\dot{r} = (C_8 p - C_2 r)q + C_4 L + C_9 N \quad (12c)$$

527 where

$$C_1 = \frac{1}{\Gamma} [(I_{yy} - I_{zz})I_{zz} - I_{xz}^2], \quad (13a)$$

$$C_2 = \frac{1}{\Gamma} [(I_{xx} - I_{yy} + I_{zz})I_{xz}], \quad (13b)$$

$$C_3 = \frac{I_{zz}}{\Gamma}, \quad C_4 = \frac{I_{xz}}{\Gamma}, \quad C_5 = \frac{I_{zz} - I_{xx}}{I_{yy}}, \quad (13c)$$

$$C_6 = \frac{I_{xz}}{I_{yy}}, \quad C_7 = \frac{1}{I_{yy}}, \quad (13d)$$

$$C_8 = \frac{1}{\Gamma} [(I_{xx} - I_{yy})I_{xz} + I_{xz}^2], \quad C_9 = \frac{I_{xx}}{\Gamma} \quad (13e)$$

532 and  $\Gamma = I_{xx}I_{zz} - I_{xz}^2$  are constants derived from the aircraft's inertia matrix relative to the axes of  
 533  $\mathcal{F}_B$ .

534 The systems of equations 1, 12 for CLMEs and CAMEs projected onto the moving frame  $\mathcal{F}_B$  must  
 535 be supplemented with additional equations to fully describe the aircraft dynamics and evolve its  
 536 state over time. One such set of equations is the flight path equations (FPEs), which describe the  
 537 aircraft's trajectory relative to the Earth-based inertial frame. These equations yield the instantaneous  
 538 position  $\{x_{E,G}(t), y_{E,G}(t), z_{E,G}(t)\}$  of the aircraft's center of gravity  $G$  in  $\mathcal{F}_E$ . The 2D version  
 539  $\{x_{E,G}(t), y_{E,G}(t)\}$  of the FPEs defines the ground track relative to the aircraft's flight path.

540 The flight path equations (FPEs) are derived by transforming the vector  $\mathbf{V}$  from frame  $\mathcal{F}_B$  to frame  
 541  $\mathcal{F}_E$ :

$$\begin{Bmatrix} \dot{x}_{E,G} \\ \dot{y}_{E,G} \\ \dot{z}_{E,G} \end{Bmatrix} = [T_{EB}] \begin{Bmatrix} u \\ v \\ w \end{Bmatrix} \quad (14)$$

542 with  $[T_{EB}] = [T_{BE}]^T$  as defined in equation 3. The matrix form of the FPEs is:

$$\begin{Bmatrix} \dot{x}_{E,G} \\ \dot{y}_{E,G} \\ \dot{z}_{E,G} \end{Bmatrix} = \begin{bmatrix} q_0^2 + q_x^2 - q_y^2 - q_z^2 & 2(q_x q_y + q_0 q_z) & 2(q_x q_z - q_0 q_y) \\ 2(q_x q_y - q_0 q_z) & q_0^2 - q_x^2 + q_y^2 - q_z^2 & 2(q_y q_z + q_0 q_x) \\ 2(q_x q_z + q_0 q_y) & 2(q_y q_z - q_0 q_x) & q_0^2 - q_x^2 - q_y^2 + q_z^2 \end{bmatrix} \begin{Bmatrix} u \\ v \\ w \end{Bmatrix} \quad (15)$$

543 The inputs for the FPEs are the aircraft's attitude quaternion components along with the components  
 544  $(u, v, w)$ , which are derived from the combined CLMEs and CAMEs system.

545 The rigid-body kinematic equations (KEs) using the aircraft's attitude quaternion components [9] are  
 546 expressed in matrix form as:

$$\begin{Bmatrix} \dot{q}_0 \\ \dot{q}_x \\ \dot{q}_y \\ \dot{q}_z \end{Bmatrix} = \frac{1}{2} \begin{bmatrix} 0 & -p & -q & -r \\ p & 0 & r & -q \\ q & -r & 0 & p \\ r & q & -p & 0 \end{bmatrix} \begin{Bmatrix} q_0 \\ q_x \\ q_y \\ q_z \end{Bmatrix} \quad (16)$$

547 The inputs to these KEs are the angular velocity components  $(p, q, r)$  in  $\mathcal{F}_B$ , and solving these  
 548 equations provides the kinematic state variables  $(q_0, q_x, q_y, q_z)$ .

549 The system comprising (CLMEs)-(CAMEs)-(FPEs)-(KEs), i.e., 1, 12, 15, and 16, represents  
 550 a complete set of 13 coupled nonlinear differential equations that describe the 6-DoF rigid-body  
 551 dynamics of atmospheric flight. These equations are in closed form once the aerodynamic and  
 552 propulsive external forces and moments are fully modeled as functions of the 13 state variables:

$$\mathbf{x} = [u, v, w, p, q, r, x_{E,G}, y_{E,G}, z_{E,G}, q_0, q_x, q_y, q_z]^T \quad (17)$$

553 This state vector  $\mathbf{x}$ , along with various external inputs grouped into an input vector, commonly  
 554 referred to as  $\mathbf{u}$ , fully characterizes the system.

555 The F-16 public domain model utilized in this study includes a sophisticated and high-fidelity flight  
 556 control system (FCS). The FCS, which incorporates state feedback from the aircraft dynamics block,  
 557 consists of the following channels: (i) Roll command  $\delta_a$  (affecting right aileron deflection angle  $\delta_a$   
 558 and antisymmetric left aileron deflection), (ii) Pitch command  $\delta_e$  (controlling elevon deflection angle  
 559  $\delta_e$ ), (iii) Yaw command  $\delta_r$  (manipulating rudder deflection angle  $\delta_r$ ), (iv) Throttle lever command  $\delta_T$   
 560 (adjusting throttle setting  $\delta_T$  and enabling jet engine afterburner).

## 561 A.2 Task Scenarios

562 The task scenarios can be categorized by objectives into *Heading, Control, and Tracking*. (1) *Heading*:  
 563 The objective is to control the fixed-wing aircraft to reach a predetermined altitude, yaw angle, and  
 564 speed within a specified time. This task serves as the foundation for multi-aircraft collaboration and  
 565 pursuit tasks. (2) *Control*: The objective is to control the fixed-wing aircraft to reach a predetermined  
 566 pitch angle, yaw angle, and speed within a specified time. This task serves as the fundamental  
 567 control basis for fixed-wing aircraft trajectory tracking. (3) *Tracking*: The objective is to control  
 568 the fixed-wing aircraft to reach a predetermined coordinate position (in the geocentric coordinate  
 569 system) within a specified time. This work designs a hierarchical control algorithm for this task.  
 570 The lower-level controller is capable of completing the Control task, while the upper-level planner  
 571 algorithm aims to achieve the overall task objective. This task forms the basis for performing aerobatic  
 572 maneuvers with fixed-wing aircraft.

573 The task scenarios can also be categorized by flight conditions into HighSpeed, HighAltitude, Windy,  
 574 and Noisy. (1) *HighSpeed*: Control of high-maneuverability flight of fixed-wing aircraft under  
 575 high-speed conditions (speed exceeding Mach 1). (2) *HighAltitude*: Control of high-maneuverability  
 576 flight of fixed-wing aircraft under high-altitude conditions (altitude exceeding 30,000 feet). (3) *Windy*:  
 577 Control of high-maneuverability flight of fixed-wing aircraft under windy conditions. (4) *Noisy*:

578 Control of high-maneuverability flight of fixed-wing aircraft when there is noise in the observation  
 579 measurements.

580 We design different environment rewards for different task objectives. For the Heading and Tracking  
 581 tasks, the environment reward is the negative Euclidean norm (L2 norm) error between the current  
 582 state and the target state. For the Control task, the environment reward is the negative optimal rotation  
 583 angle from the current attitude to the target attitude. We also designed various termination conditions  
 584 and terminal rewards for different tasks, as shown in Table 5.

Table 5: Termination conditions and terminal rewards for different tasks.

| Name          | Key Value                                   | Description                         | Terminal reward |
|---------------|---------------------------------------------|-------------------------------------|-----------------|
| ExtremeState  | AOA, AOS                                    | AOA and AOS exceeding limit ranges. | -200            |
| HighSpeed     | TAS                                         | speed exceeding Mach 3.             | -200            |
| LowAltitude   | altitude                                    | altitude falling below 2500 feet.   | -200            |
| LowSpeed      | TAS                                         | speed falling below Mach 0.01.      | -200            |
| overload      | G                                           | G exceeding 10.                     | -200            |
| UnreachTarget | $\mathbf{x}_t - \mathbf{x}_{\text{target}}$ | the target is not reached.          | -200            |
| ResetTarget   | $\mathbf{x}_t - \mathbf{x}_{\text{target}}$ | the target is successfully reached. | 200             |

585 **A.3 Baseline Libraries**

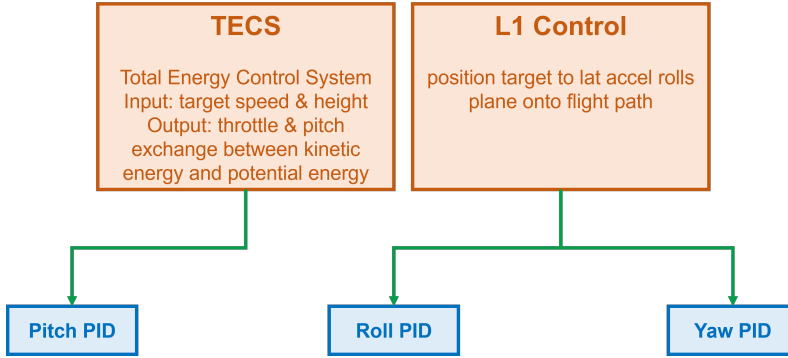

Figure 9: The control system structure for traditional methods.

586 **Traditional Methods** These are based on open-source fixed-wing aircraft control algorithms from  
 587 the Ardupilot platform, using a hierarchical control approach. The upper layer includes the TECS  
 588 controller [51], which manages the aircraft’s total flight energy by adjusting throttle and pitch to  
 589 maintain desired altitude and speed, and the L1 controller [52], which manages the flight path by  
 590 adjusting roll and yaw to follow waypoints or desired path characteristics. The lower layer consists  
 591 of an attitude loop controller using a dual-loop PID algorithm to control the aircraft’s surfaces and  
 592 achieve three-axis attitude tracking. The control system structure for traditional methods is shown in  
 593 Figure 9.

594 **RL Methods** We use PPO for Heading and Control tasks in fixed-wing aircraft. For the Tracking  
 595 task, we use a hierarchical RL method: the upper-level algorithm converts the target location into  
 596 desired pitch, yaw, and speed, while the lower level uses the trained PPO algorithm to control the  
 597 aircraft’s surfaces. The structure for hierarchical RL method is shown in Figure 10.

598 The PPO algorithm’s parameter settings are as follows: the learning rate is set to  $3 \times 10^{-4}$ , the  
 599 number of PPO epochs is 16, the clipping parameter is 0.2, the maximum gradient norm is 2, and the  
 600 entropy coefficient is  $1 \times 10^{-3}$ . Additionally, the hidden layer sizes for the neural networks are set to  
 601 "128 128", and the recurrent hidden layer size is 128 with a single recurrent layer.

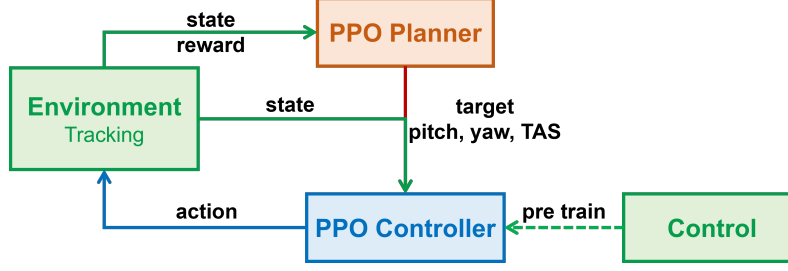

Figure 10: The structure for hierarchical RL method.

#### 602 A.4 Evaluation Metrics

603 We provide two types of performance evaluation metrics to assess the algorithm’s performance of  
 604 fixed-wing aircraft control: maneuverability indicators and safety indicators. The complete set of  
 605 evaluation metrics is shown in Table 6.

Table 6: Performance metrics to assess the algorithm’s performance of fixed-wing aircraft control.

| Type                       | Name  | Description                                      |
|----------------------------|-------|--------------------------------------------------|
| Maneuverability Indicators | G     | Average G-force during flight.                   |
|                            | TAS   | Average True Air Speed during flight.            |
|                            | RoC   | Average Rate of Climb during flight.             |
|                            | AOA   | Average Angle of Attack during flight.           |
|                            | AOS   | Average Angle of Sideslip during flight.         |
|                            | t     | Average time to complete the task objective.     |
|                            | P     | Average roll rate around the body-fixed x-axis.  |
|                            | Q     | Average pitch rate around the body-fixed y-axis. |
| Safety Indicators          | R     | Average yaw rate around the body-fixed z-axis.   |
|                            | ASM   | Altitude Safety Margin.                          |
|                            | SSM   | Speed Safety Margin.                             |
|                            | OSM   | Overload Safety Margin.                          |
|                            | AOASM | Angle of Attack Safety Margin.                   |
|                            | AOSSM | Angle of Sideslip Safety Margin.                 |
|                            | FSM   | Smoothness of the aircraft’s flight state.       |

#### 606 A.5 Code Structure

607 The overall code framework and workflow of the platform are illustrated in Figure 11. We also  
 608 provide a complete algorithmic process for training, testing, and evaluating RL algorithms on the  
 609 platform. Once the appropriate parameters are selected, the platform can automatically execute the  
 610 algorithm training, testing, and evaluation processes.

---

#### Algorithm 1 NeuralPlaneTrainer

---

**Require:** User-designed learnable agent  $A$ , user-specified FDM  $M$ , user-specified task scenario  $T$

**Ensure:** Trained Agent  $A$ , training records

- 1: Initialize environment with FDM and task scenario  $Env = Env\_Initialize(M, T)$ ;
  - 2: **while** max learning steps Not reached **do**
  - 3:    $A.train\_episode(Env)$ ;
  - 4:   Record training data;
  - 5:   Plot training figures;
  - 6: **end while**
  - 7: Summarize and visualize the training records in *Logger* and return the trained agent;
-

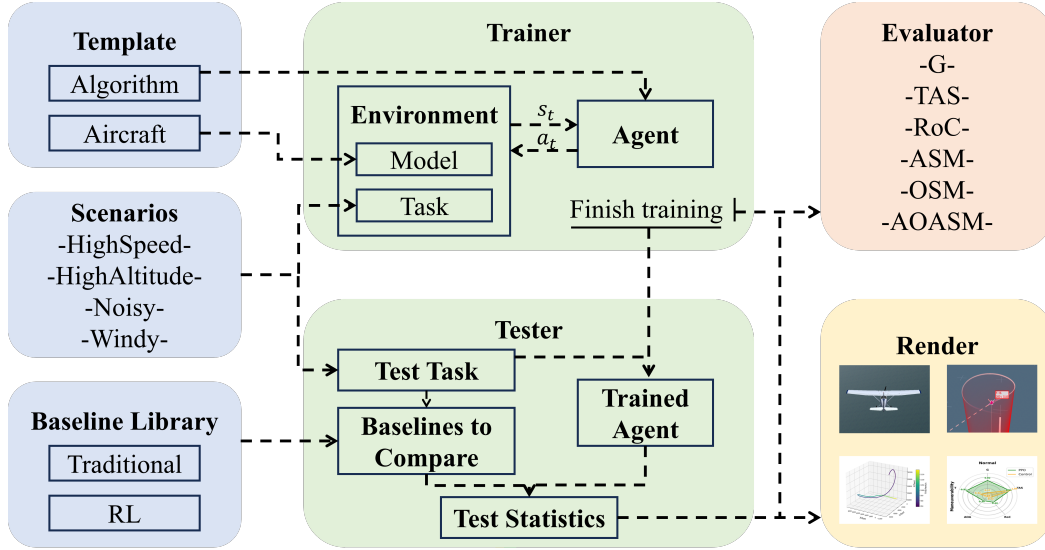

Figure 11: The overall code framework and workflow of NeuralPlane.

---

**Algorithm 2** TrainingEpisode

---

**Require:** User-designed learnable agent  $A$ , Constructed environment  $Env$

**Ensure:** Training records

- 1:  $state = Env.reset()$ ;
  - 2: **while** termination condition Not achieved **do**
  - 3:    $action = A.get\_action(state)$ ;
  - 4:    $next\_state, reward, done, info = Env.step(action)$ ;
  - 5:   Store transition  $\langle state, action, reward, done, next\_state \rangle$ ;
  - 6:   Update agent  $A$ ;
  - 7:   Record training data and plot figures;
  - 8:    $state = next\_state$ ;
  - 9: **end while**
  - 10: Summarize training records and return;
- 

---

**Algorithm 3** NeuralPlaneTester and NeuralPlaneEvaluator

---

**Require:** User-specified algorithm set  $B$  including baselines and user's trained agent, user-specified FDM  $M$ , User-specified task scenario  $T$

**Ensure:** Testing results

- 1: Initialize environment with FDM and task scenario  $Env = Env\_Initialize(M, T)$ ;
  - 2: **for** each algorithm  $alg \in B$  **do**
  - 3:    $alg.rollout\_episode(Env)$ ;
  - 4:   Record testing data;
  - 5:   Plot testing figures;
  - 6: **end for**
  - 7: Summarize testing results and call *Evaluator* for standardized metrics and visualization;
-

611 The pseudo-code for the Trainer is detailed in Algorithm 1. With a user-designed learnable agent  $A$ ,  
 612 a user-specified FDM  $M$ , and a user-specified task scenario  $T$ , the NeuralPlane first initializes the  
 613 environment by determining task scenario and FDM. MetaBox then iteratively trains on each instance  
 614 until the maximum learning steps are reached. For each instance, agent  $A$  calls the `train_episode()`  
 615 function to interact with  $Env$  and perform the training. All training logs are managed by the *Logger*.

616 Next, we focus on the `train_episode()` function. In Algorithm 2, we present a straightforward  
 617 example of implementing RL training algorithms within `train_episode()`. Starting from  $Env$   
 618 initialization, in each step, agent  $A$  provides  $Env$  with actions based on the current state, receives the  
 619 next state, reward, and other information, and updates the policy accordingly. Within the `env.step()`  
 620 interface, actions are translated into configurations applied to the aircraft. Rewards and subsequent  
 621 states are calculated, with logging information summarized concurrently.

622 For the Tester and Evaluator shown in Algorithm 3, the environment is first initialized to evalu-  
 623 ate each algorithm in the set (including several baseline agents and the user’s trained agent). The  
 624 `rollout_episode()` interface is similar to `train_episode()`, but it does not include the pol-  
 625 icy update procedures. Finally, NeuralPlane evaluates the algorithm’s performance and provides  
 626 visualization of fixed-wing aircraft flight trajectories based on the flight data generated from testing.

## 627 B Details of Experiments

### 628 B.1 Experimental Parameters

629 Before researchers can use NeuralPlane to complete the full workflow of algorithm training, testing,  
 630 evaluation, and replay, two preliminary steps must be completed: 1) Determine the fixed-wing aircraft  
 631 dynamics model to be used, the task objectives that the algorithm will control the aircraft to achieve,  
 632 and the operational conditions. This step is used to initialize the basic parameters of NeuralPlane’s  
 633 core simulation environment. 2) Determine the maximum number of training steps ( $M$ ), the number  
 634 of parallel rollouts during training ( $n$ ), and the number of steps per rollout in one iteration ( $m$ ).  
 635 After setting these parameters, the platform can automatically execute the complete process. The  
 636 experimental parameter settings for different task scenarios are shown in Table 7.

Table 7: The experimental parameter settings for different task scenarios

| Name     | n     | m    | M                  | env      | scenario | model |
|----------|-------|------|--------------------|----------|----------|-------|
| Heading  | 3000  | 3000 | $1.35 \times 10^9$ | Control  | heading  | F16   |
| Control  | 3000  | 3000 | $2.25 \times 10^9$ | Control  | control  | F16   |
| Tracking | 10000 | 100  | $3 \times 10^8$    | Planning | tracking | F16   |

### 637 B.2 Additional Experimental Results

638 We conduct multiple experiments across all task scenarios, thoroughly demonstrating NeuralPlane’s  
 639 superiority in supporting RL algorithm training and showcasing the powerful capabilities of RL  
 640 algorithms in fixed-wing aircraft control. Some experimental results are shown in Figure 12, 13, 14,  
 641 with all results available at <https://anonymous.4open.science/r/NeuralPlane>. The results  
 642 also indicate that in some high-difficulty scenarios, the control effectiveness of RL algorithms needs  
 643 improvement, highlighting the platform’s value and potential for RL research.

644 We also test the RL algorithms across all task scenarios and perform a visual evaluation of their  
 645 performance. Some visualization results are shown in Figure 15, with all experimental results  
 646 available at <https://anonymous.4open.science/r/NeuralPlane>.



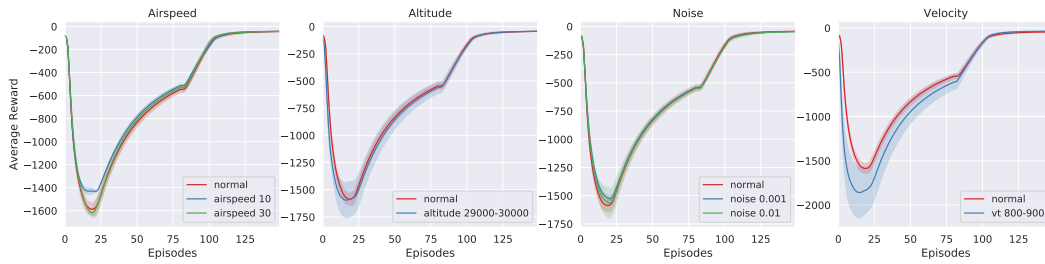

Figure 12: Training curves of PPO in different task scenarios. **From left to right**, the task conditions are different wind speeds, different flight altitudes, different environmental noise levels, and different flight speeds, with the task objective being the Heading task in all cases.

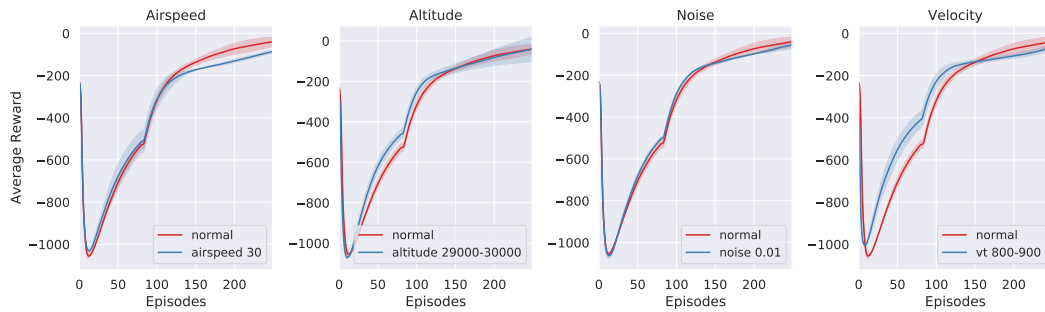

Figure 13: Training curves of PPO in different task scenarios. **From left to right**, the task conditions are different wind speeds, different flight altitudes, different environmental noise levels, and different flight speeds, with the task objective being the Control task in all cases.

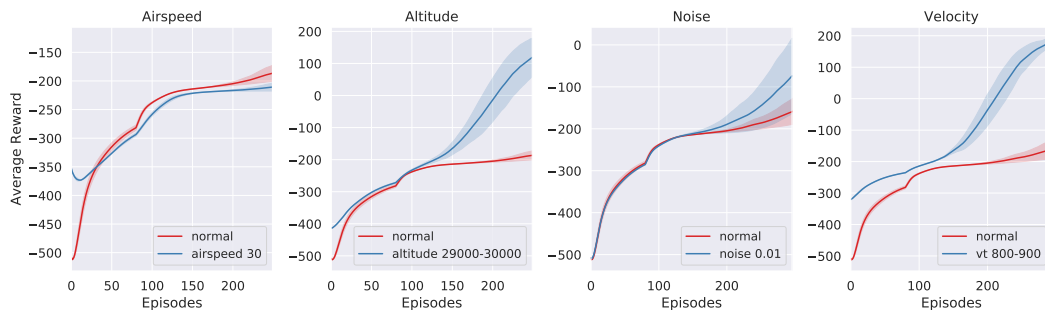

Figure 14: Training curves of PPO in different task scenarios. **From left to right**, the task conditions are different wind speeds, different flight altitudes, different environmental noise levels, and different flight speeds, with the task objective being the Tracking task in all cases.

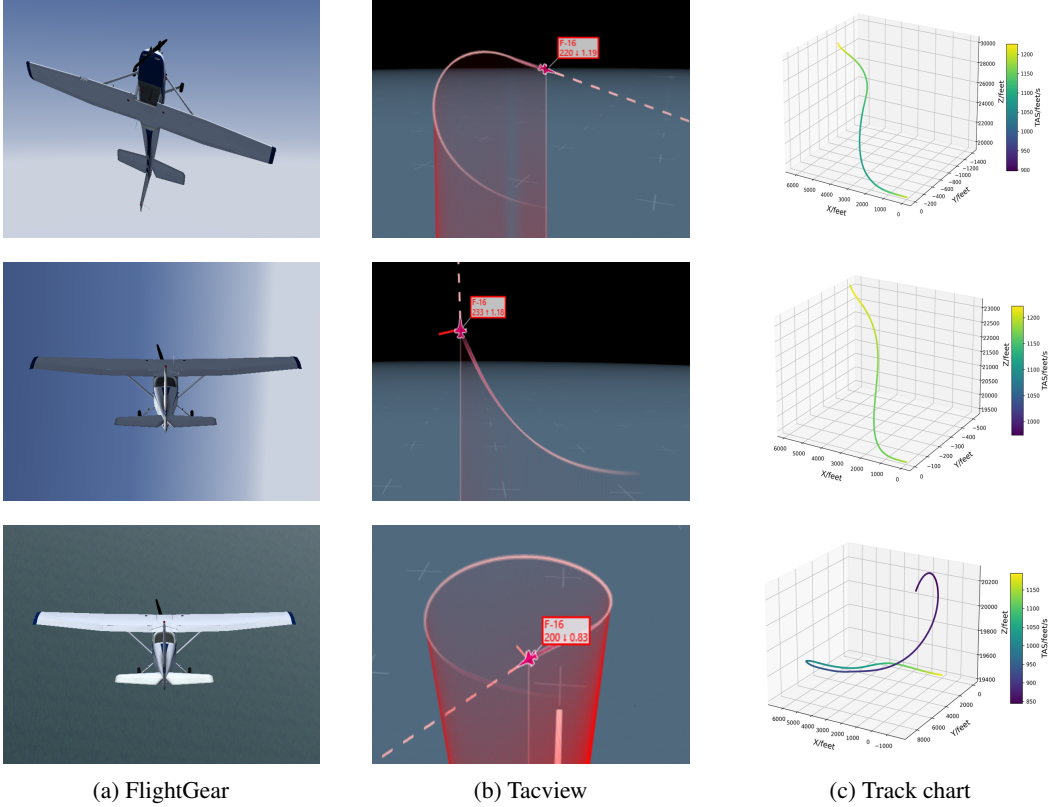

Figure 15: Visualization of fixed-wing aircraft flight trajectories. **Top**: The results of the Heading task. **Middle**: The results of the Control task. **Bottom**: The results of the Tracking task.

647 **C Used Assets**

648 NeuralPlane is an open-source tool available at [https://anonymous.4open.science/r/](https://anonymous.4open.science/r/NeuralPlane)  
 649 NeuralPlane. It is licensed under the LGPL-3.0 license. Table 8 lists the resources and as-  
 650 sets used in NeuralPlane along with their respective licenses. We strictly adhere to these licenses  
 651 during the development of NeuralPlane.

Table 8: Used assets and their licenses

| Type                | Asset          | Codebase            | License          |
|---------------------|----------------|---------------------|------------------|
| Baseline            | PPO [27]       | CloseAirCombat [54] | LGPL-3.0 license |
| Platform to Compare | Ardupilot [22] | Ardupilot [22]      | LGPL-3.0 license |
|                     | JSBSim [21]    | JSBSim [21]         | LGPL-2.1 license |
|                     | QPlane [23]    | QPlane [23]         | -                |
